# Supplementary material for: Multi-step electrodeposited Ni–Co–P@LDH nanocomposites for high-performance interdigital asymmetric micro-supercapacitors
Source: Royal Society of Chemistry journal article supplement (doi:10.1039/d1dt04145b), 2022-01-01
Supplement: d1dt04145b1.pdf [file d1dt04145b1.pdf]

## Supporting Information (SI) for

# Multi-step electrodeposited hierarchical Ni-Co-P@LDHs nanocomposites for high-performance interdigital asymmetric micro- supercapacitors

Jianhui Zhan<sup>a</sup>, Hui Yang<sup>a,b</sup>, Qilong Zhang<sup>a,b,\*</sup>, Quan Zong<sup>a</sup>, Wei Du<sup>a</sup>, Qianqian Wang<sup>a</sup>.

*a School of Materials Science and Engineering, State Key Lab Silicon Mat, Zhejiang University, Hangzhou 310027, PR China*

*b ZJU-Guangxi-ASEAN Innovation & Research Center, Nanning 530022, PR China*

*\*Corresponding Author. E-mail: mse237@zju.edu.cn*

### ***1. synthesis of FeOOH on interdigital Au/PET substrate***

The synthesis process of FeOOH, the anode material, is also via an electrodeposition step. Firstly, 0.86 g CH<sub>3</sub>COONa and 0.98 g (NH<sub>4</sub>)<sub>2</sub>Fe(SO<sub>4</sub>)<sub>2</sub> were added into 245 mL DI, 5 mL 1 M H<sub>2</sub>SO<sub>4</sub> solution was also added for inhibiting the hydrolysis of Fe<sup>2+</sup>. After stirring, excess reduced iron powder was added into the solution to adjust the pH. Then the depositing process was carried out via a standard three-electrode system, in which one finger of conductive Au/PET substrate was employed as the working electrode. FeOOH nanosheets were electrodeposited via potentiostatic method, under the potential of 0.8 V (vs. SCE) at 65°C for 100 min. After deposition, the Au/PET substrate was slightly rinsed by DI and ethanol for three times respectively, then it was transferred into a vacuum oven and dried at 60 °C for 4 h.

## 2. preparation of PVA-KOH gel

PVA/KOH gel was prepared as the following method: 2.0 g PVA-1788 was firstly dissolved into 20 mL DI and kept stirring at low speed under 80 °C for 2 h. Then, a solution contains 1.68 g KOH and 10 mL DI was dropwise added into the transparent polymer solution under stirring. At last, the PVA/KOH gel was prepared after cooling and low-speed stirring at room temperature.

## 3. The low-scan rate CV curves of Ni-Co-P electrode and LDHs electrode

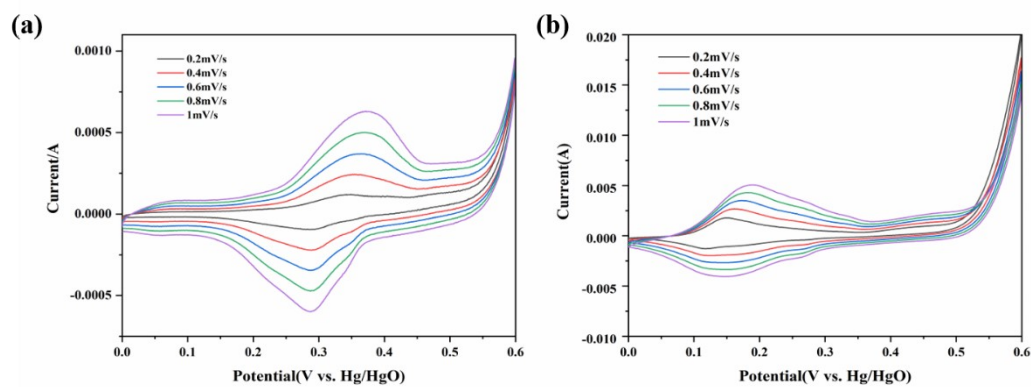

**Fig S1.** CV curves of (a) Ni-Co-P electrode, (b) LDHs electrode at low scan rates from 0.2 to 1 mV

s<sup>-1</sup>.

#### 4. The *i-t* and CV curves of electrodepositing process

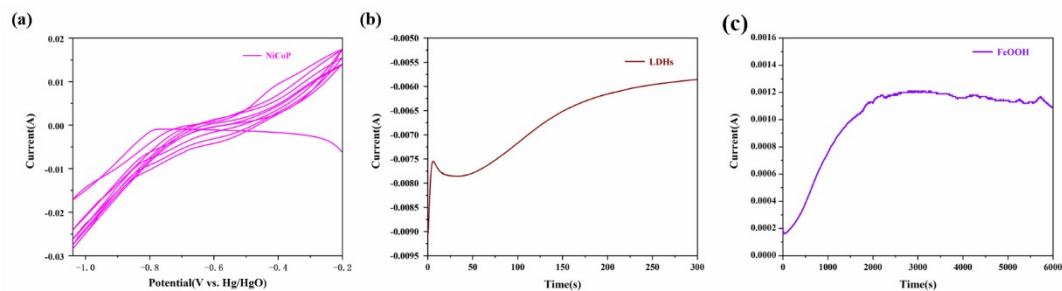

**Fig S2.** (a) CV curves of Ni-Co-P electrodeposition; (b) *i-t* curves of LDHs electrodeposition; (c) *i-t* curves of FeOOH electrodeposition.

#### 5. The electrochemical performance of individual FeOOH electrode

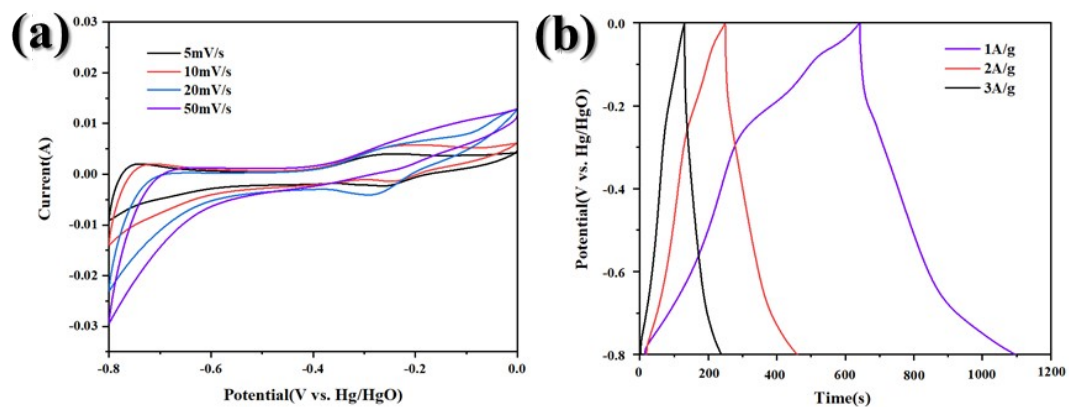

**Fig S3.** (a) CV curves at different scan rates, (b) GCD curves at different current density of individual FeOOH electrode.

**6. The macro and micro appearances of AMSC Ni-Co-P//PVA-KOH//FeOOH**

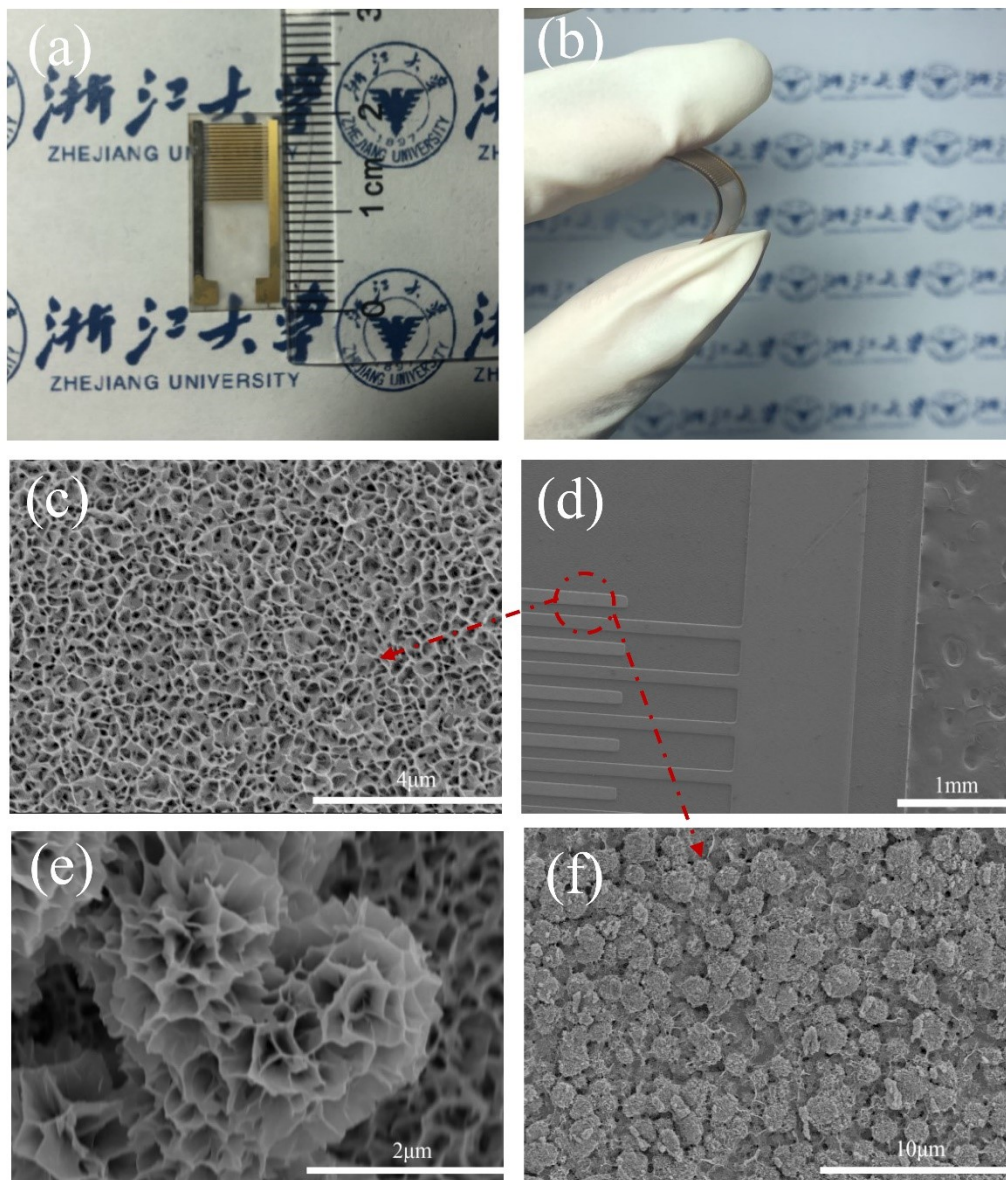

**Fig S4.** (a) The macro appearance and (b) The flexibility of as-prepared interdigital electrodes; (c) The SEM images of FeOOH nanosheets deposited on the Au finger; (d) The SEM images of the interdigital substrate; (e) A heart-shaped nanoflower of FeOOH; (f) The SEM images of Ni-Co-P@LDHs nanocomposites deposited on the Au finger

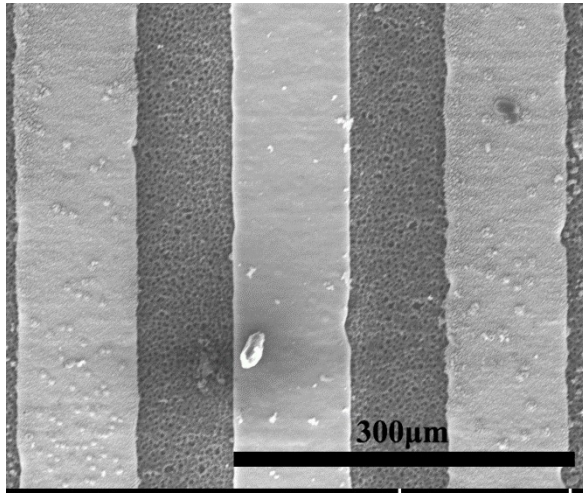

**Fig S5.** The SEM image of AMSC device.

## 7. The characterization of FeOOH

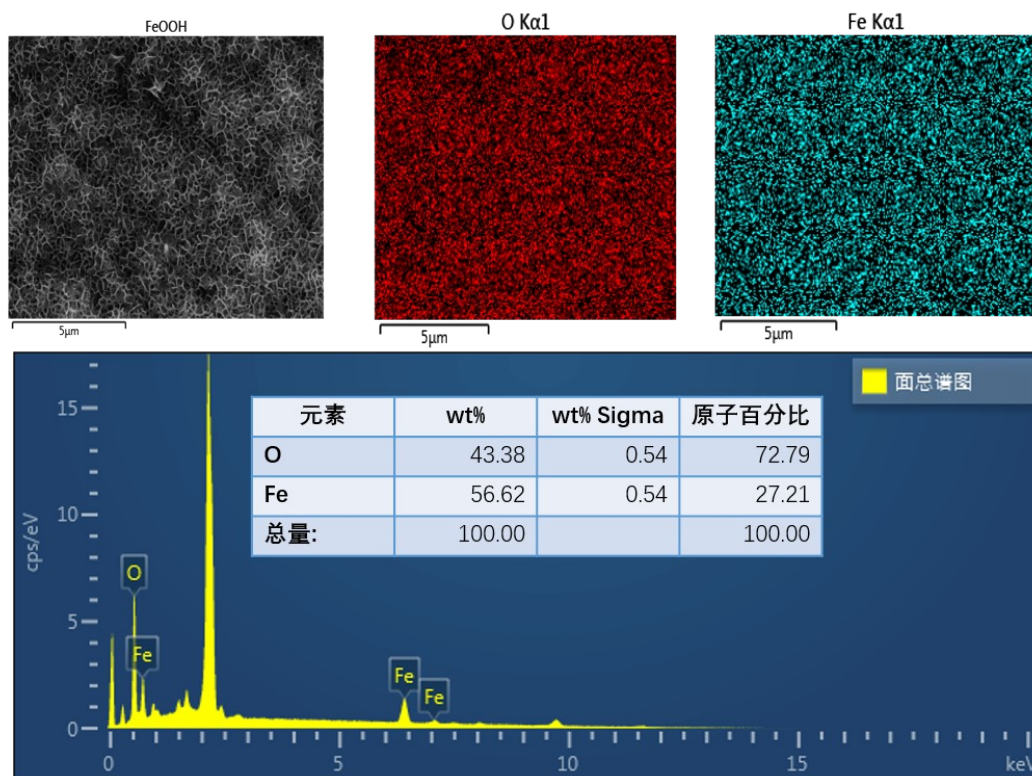

Fig S6. The EDS mapping images of FeOOH nanosheets.

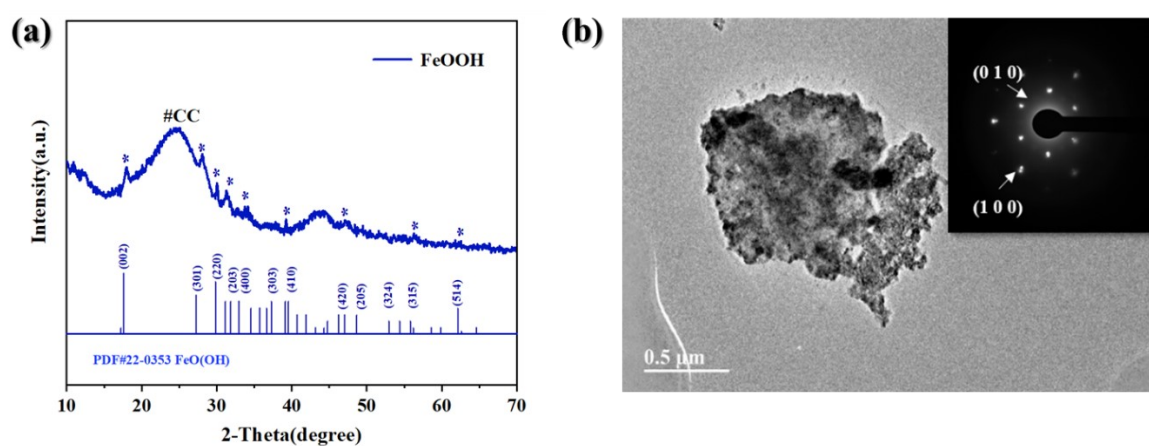

Fig S7. (a) The XRD pattern, (b) The TEM image and SAED pattern of FeOOH nanosheets.



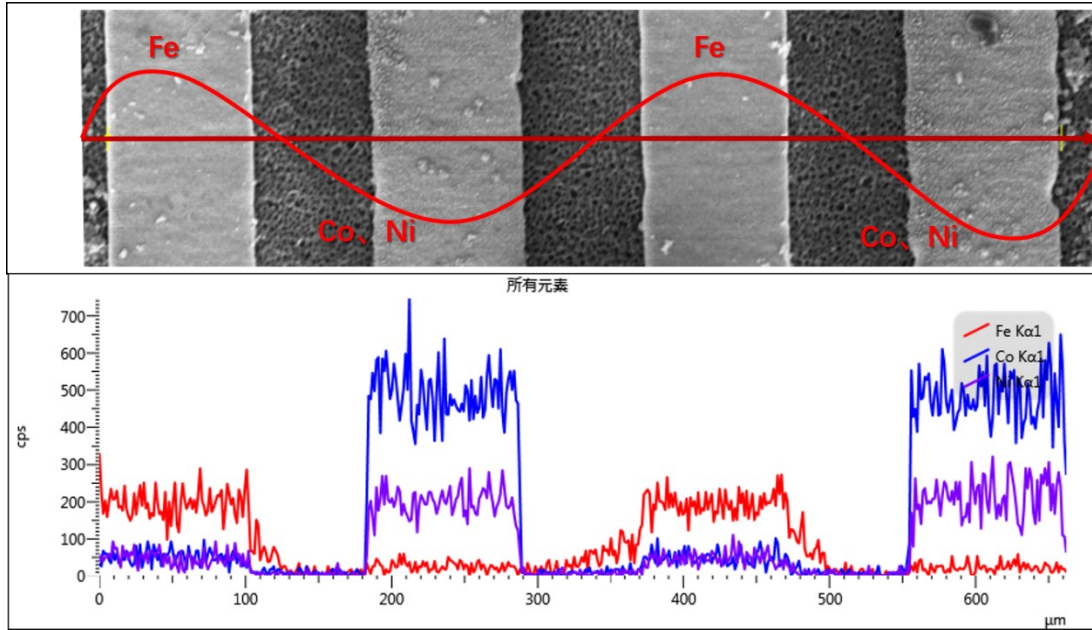

**Fig S8.** The EDS distribution of Fe, Co and Ni along the direction perpendicular to the fingers.

### ***8. The equivalent circuit in fitting***

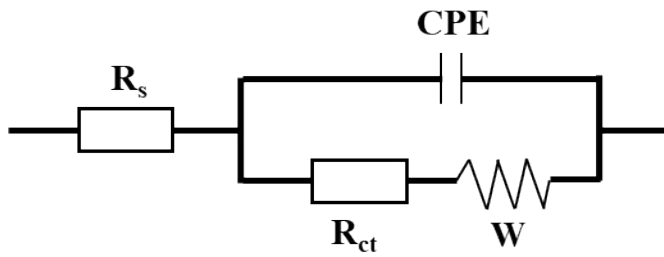

**Fig S9.** The equivalent circuit in EIS tests and fitting processes.

**Table S1**

Comparison on the working voltage and areal capacitance of different interdigital micro-supercapacitors.

| Positive materials       | Negative materials       | Electrolyte                         | Working voltage | Areal capacitance                                      | Refs.           |
|--------------------------|--------------------------|-------------------------------------|-----------------|--------------------------------------------------------|-----------------|
| ZIF-8 derived carbon     | ZIF-8 derived carbon     | PVA/KOH                             | 0.8 V           | —                                                      | 1               |
| MXene                    | RGO                      | PVA/H <sub>2</sub> SO <sub>4</sub>  | 1.0 V           | 2.4 mF cm <sup>-2</sup>                                | 2               |
| MnO <sub>2</sub>         | Ag                       | PVA/KOH                             | 1.0 V           | <b>46.6 mF cm<sup>-2</sup></b>                         | 3               |
| CuSe@MnOOH               | CuSe@FeOOH               | PVA/LiCl                            | 1.3 V           | 20.5 mF cm <sup>-2</sup>                               | 4               |
| Ag@ppy                   | Ag@ppy                   | PVA/H <sub>3</sub> PO <sub>4</sub>  | 0.8 V           | <b>47.5 mF cm<sup>-2</sup></b>                         | 5               |
| LIC-MOFs                 | LIC-MOFs                 | 1M H <sub>2</sub> SO <sub>4</sub>   | 1.0 V           | 8.1 mF cm <sup>-2</sup>                                | 6               |
| MWCNTs                   | MWCNTs                   | PVA/H <sub>3</sub> PO <sub>4</sub>  | 1.0 V           | 19.5 mF cm <sup>-2</sup>                               | 7               |
| Ni@MnO <sub>2</sub>      | Ni@MnO <sub>2</sub>      | CMC/Na <sub>2</sub> SO <sub>4</sub> | 0.8 V           | 10.8 mF cm <sup>-2</sup>                               | 8               |
| B-doped Graphene         | B-doped Graphene         | PVA/H <sub>2</sub> SO <sub>4</sub>  | 1.0 V           | 16.5 mF cm <sup>-2</sup>                               | 9               |
| Co(OH) <sub>2</sub>      | VN                       | PVA/KOH                             | <b>1.5 V</b>    | 21.0 mF cm <sup>-2</sup>                               | 10              |
| CuSe@Ni(OH) <sub>2</sub> | CuSe@Ni(OH) <sub>2</sub> | PVA/LiCl                            | 1.0V            | 11.6 mF cm <sup>-2</sup><br>(38.9 F cm <sup>-3</sup> ) | 11              |
| <b>Ni-Co-P@LDHs</b>      | <b>FeOOH</b>             | <b>PVA/KOH</b>                      | <b>1.4 V</b>    | <b>24.0 mF cm<sup>-2</sup></b>                         | <b>Our Work</b> |



## References:

1. Y. Li, H. Xie, J. Li, Y. Bando, Y. Yamauchi and J. Henzie, *Carbon*, 2019, **152**, 688-696.
2. C. Couly, M. Alhabeb, K. L. Van Aken, N. Kurra, L. Gomes, A. M. Navarro-Suarez, B. Anasori, H. N. Alshareef and Y. Gogotsi, *Advanced Electronic Materials*, 2018, **4**, 1700339
3. T. Cheng, Y. W. Wu, Y. L. Chen, Y. Z. Zhang, W. Y. Lai and W. Huang, *Small*, 2019, **15**, 1901830..
4. J. C. Li, J. F. Gong, X. S. Zhang, L. Z. Lu, F. Liu, Z. H. Dai, Q. J. Wang, X. H. Hong, H. Pang and M. Han, *ACS Applied Energy Materials*, 2020, **3**, 3692-3703.
5. L. Liu, Q. Lu, S. L. Yang, J. Guo, Q. Y. Tian, W. J. Yao, Z. H. Guo, V. A. L. Roy and W. Wu, *Advanced Materials Technologies*, 2018, **3**, 1700206.
6. W. Zhang, R. Li, H. Zheng, J. S. Bao, Y. J. Tang and K. Zhou, *Advanced Functional Materials*, 2021, **31**, 2009057.
7. B. B. Nie, X. M. Li, J. Y. Shao, C. M. Li, P. C. Sun, Y. C. Wang, H. M. Tian, C. H. Wang and X. L. Chen, *Nanoscale*, 2019, **11**, 19772-19782.
8. Y. B. Chen, S. J. Xie, G. J. Li, S. S. Jia, X. D. Gao and X. M. Li, *Applied Surface Science*, 2019, **494**, 29-36.
9. Z. W. Peng, R. Q. Ye, J. A. Mann, D. Zakhidov, Y. L. Li, P. R. Smalley, J. Lin and J. M. Tour, *ACS Nano*, 2015, **9**, 5868-5875.
10. S. Wang, Z. S. Wu, F. Zhou, X. Y. Shi, S. H. Zheng, J. Q. Qin, H. Xiao, C. L. Sun and X. H. Bao, *NPJ 2D Materials and Applications*, 2018, **2**, 7.
11. J. Gong, J.-C. Li, J. Yang, S. Zhao, Z. Yang, K. Zhang, J. Bao, H. Pang and M. Han, *ACS Applied Materials & Interfaces*, 2018, **10**, 38341-38349.
